# Supplementary material for: Causal association of genetically determined plasma metabolites with osteoarthritis: a two-sample Mendelian randomization study
Source: Frontiers journal article supplement (doi:10.3389/fmed.2024.1396746), 2024-06-28
Supplement: Data_Sheet_2.pdf [file Data_Sheet_2.pdf]

**Supplementary Figures and Tables**

**Supplementary Figures**

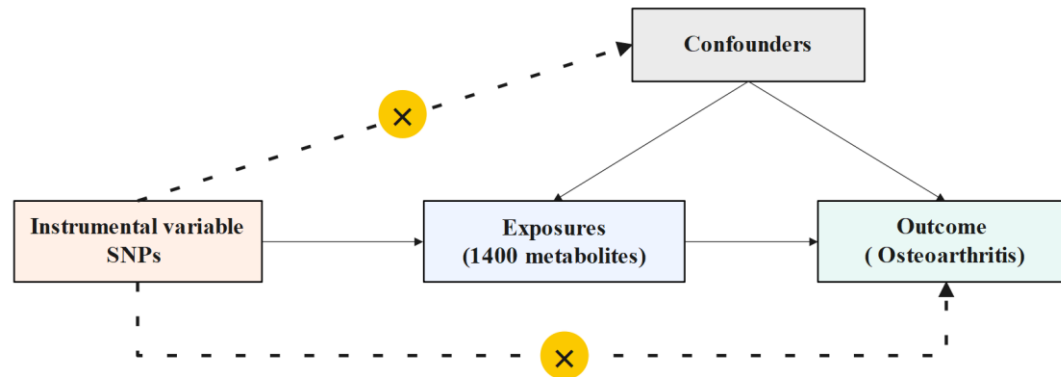

**Supplementary Figure 1.** Three key hypotheses of instrumental variables.

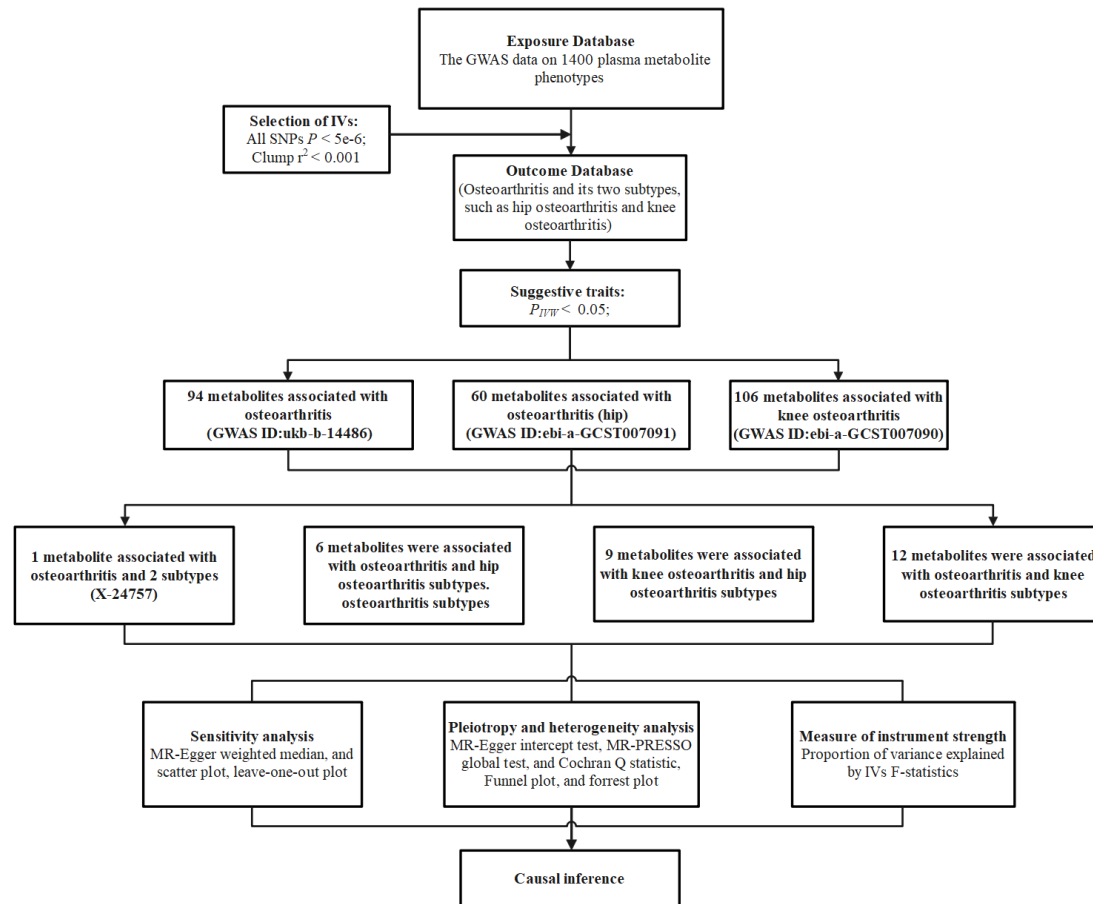

**Supplementary Figure 2.** Flow diagram.

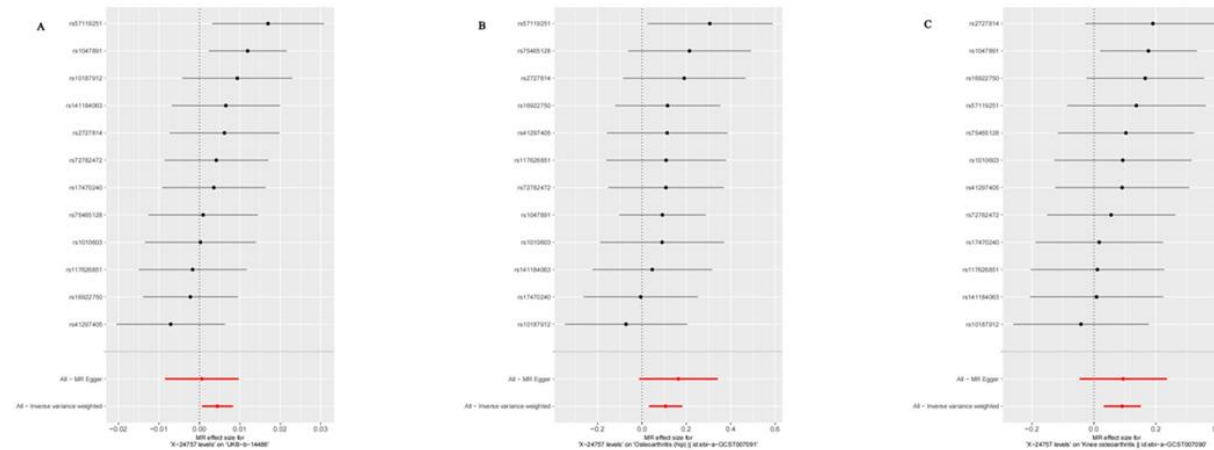

**Supplementary Figure 3.** Forest Plots depicting the overlapping metabolites (X-24757) associated with osteoarthritis, osteoarthritis (hip) and knee osteoarthritis using Mendelian Randomization Analysis.

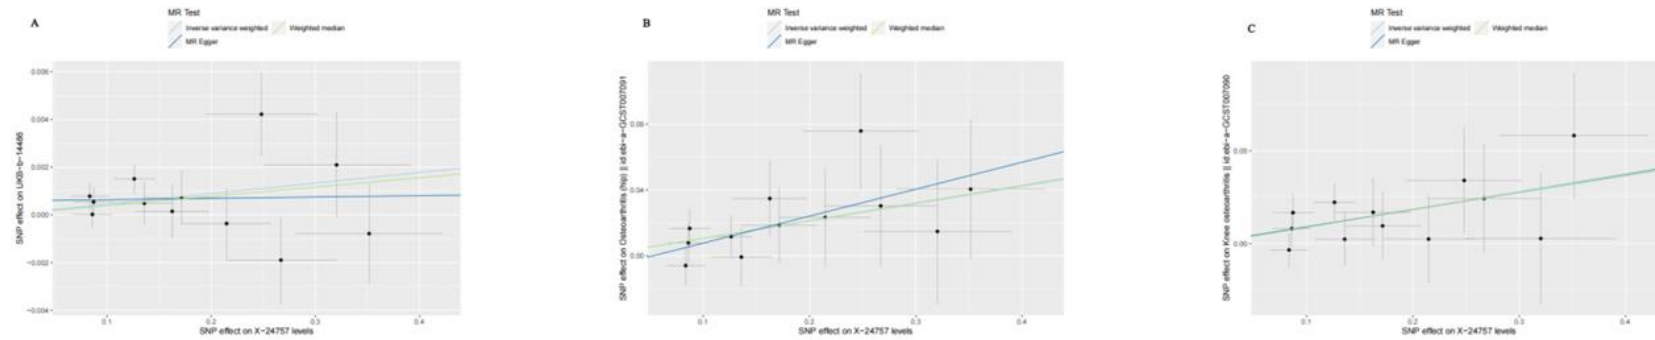

**Supplementary Figure 4.** Scatter Plots depicting the overlapping metabolites (X-24757) associated with osteoarthritis, osteoarthritis (hip) and knee osteoarthritis using Mendelian Randomization Analysis.

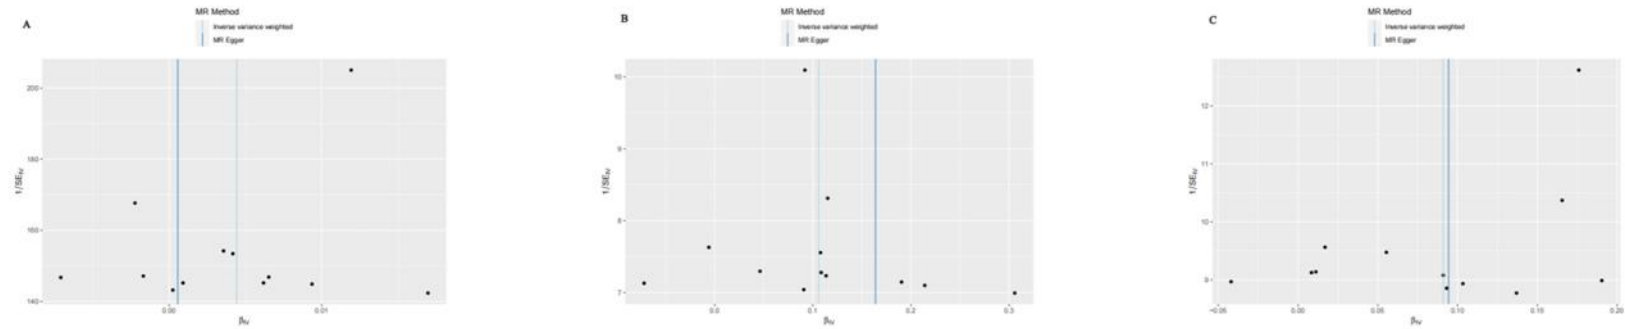

**Supplementary Figure 5.** unnel Plots depicting the overlapping metabolites (X-24757) associated with osteoarthritis, osteoarthritis (hip) and knee osteoarthritis using Mendelian Randomization Analysis.

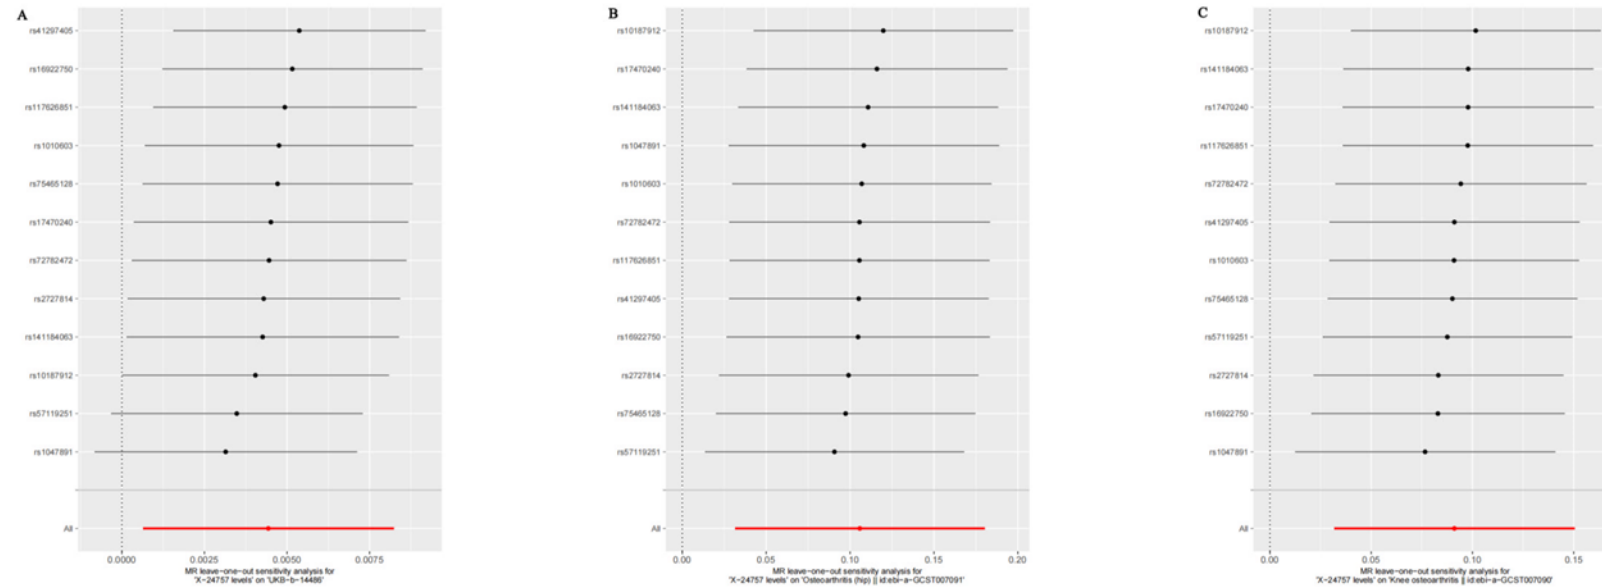

**Supplementary Figure 6.** Leave-One-Out Plots depicting the overlapping metabolites (X-24757) associated with osteoarthritis, osteoarthritis (hip) and knee osteoarthritis using Mendelian Randomization Analysis.
